# Supplementary material
Source: MDPI journal article supplement (https://www.mdpi.com/2079-6412/12/3/375)
Supplement: s1 [file s1]

# Supplementary Materials: Examining the Potential of Enzyme-Based Detergents to Remove Biofouling from Limestone Heritage

Laurenz Schröer <sup>1,2</sup>, Géraldine Fiers <sup>1</sup>, Maxim Deprez <sup>1</sup>, Nico Boon <sup>2</sup>, Veerle Cnudde <sup>1,3</sup>, Lander Soens <sup>4</sup> and Tim De Kock <sup>1,5,\*</sup>

<sup>1</sup> PProGress, Department of Geology, Ghent University, Krijgslaan 281/S8, 9000 Ghent, Belgium; laurenz.schroer@ugent.be (L.S.); geraldine.fiers@ugent.be (G.F.); maxim.deprez@ugent.be (M.D.); veerle.cnudde@ugent.be (V.C.)

<sup>2</sup> Center for Microbial Ecology and Technology (CMET), Department of Biotechnology, Ghent University, Coupure Links 653, 9000 Ghent, Belgium; nico.boon@ugent.be

<sup>3</sup> Environmental Hydrogeology, Department of Earth Sciences, Utrecht University, Princetonlaan 8a, 3584 Utrecht, The Netherlands

<sup>4</sup> Commonwealth War Graves Commission, Elverdingestraat 82, 8900 Ypres, Belgium; lander.soens@cwgc.org

<sup>5</sup> Antwerp Cultural Heritage Sciences (ARCHES), University of Antwerp, Mutsaardstraat 31, 2000 Antwerp, Belgium

\* Correspondence: tim.dekock@uantwerpen.be

**Citation:** Schröer, L.; Fiers, G.; Deprez, M.; Boon, N.; Cnudde, V.; Soens, L.; De Kock, T. Examining the Potential of Enzyme-Based Detergents to Remove Biofouling from Limestone Heritage. *Coatings* **2022**, *12*, 375. <https://doi.org/10.3390/coatings12030375>

Academic Editors: Beatriz Prieto and Ana Zélia Miller

Received: 8 February 2022

Accepted: 9 March 2022

Published: 11 March 2022

**Publisher's Note:** MDPI stays neutral with regard to jurisdictional claims in published maps and institutional affiliations.

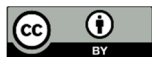

**Copyright:** © 2022 by the authors. Licensee MDPI, Basel, Switzerland. This article is an open access article distributed under the terms and conditions of the Creative Commons Attribution (CC BY) license (<http://creativecommons.org/licenses/by/4.0/>).

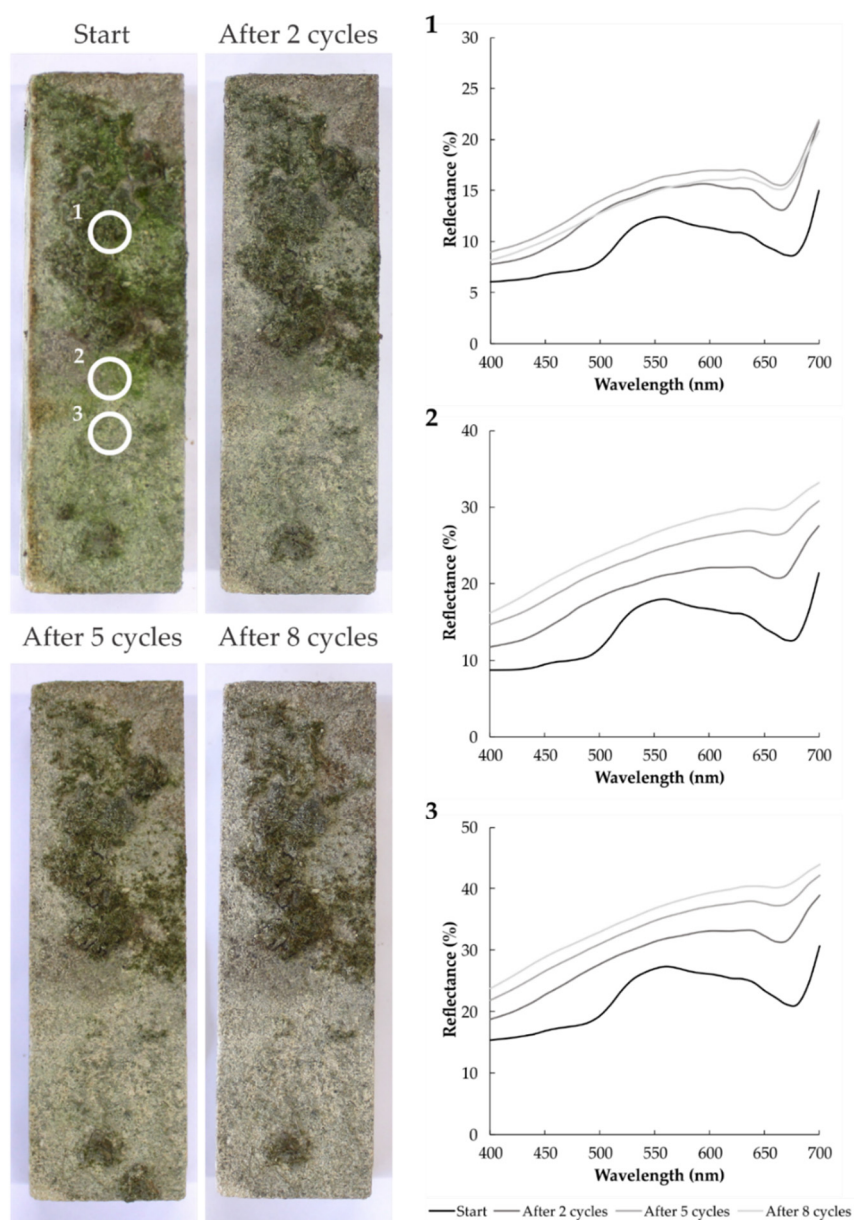

**Figure S1.** Appearance and spectral reflectance graphs determined at fixed locations 1, 2 and 3 of treated Sample 1 from the start and after different cycles of water runoff and drought.

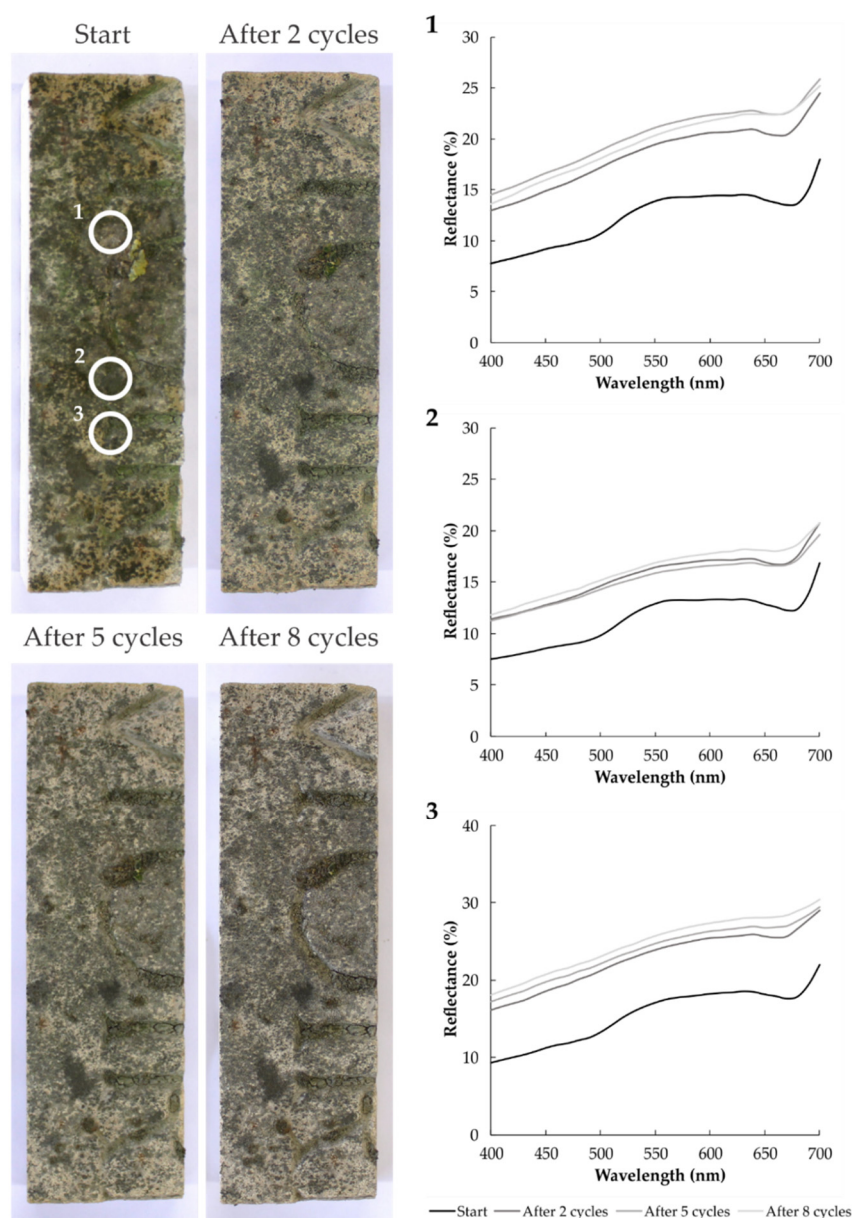

**Figure S2.** Appearance and spectral reflectance graphs determined at fixed locations 1, 2 and 3 of treated Sample 2 from the start and after different cycles of water runoff and drought.

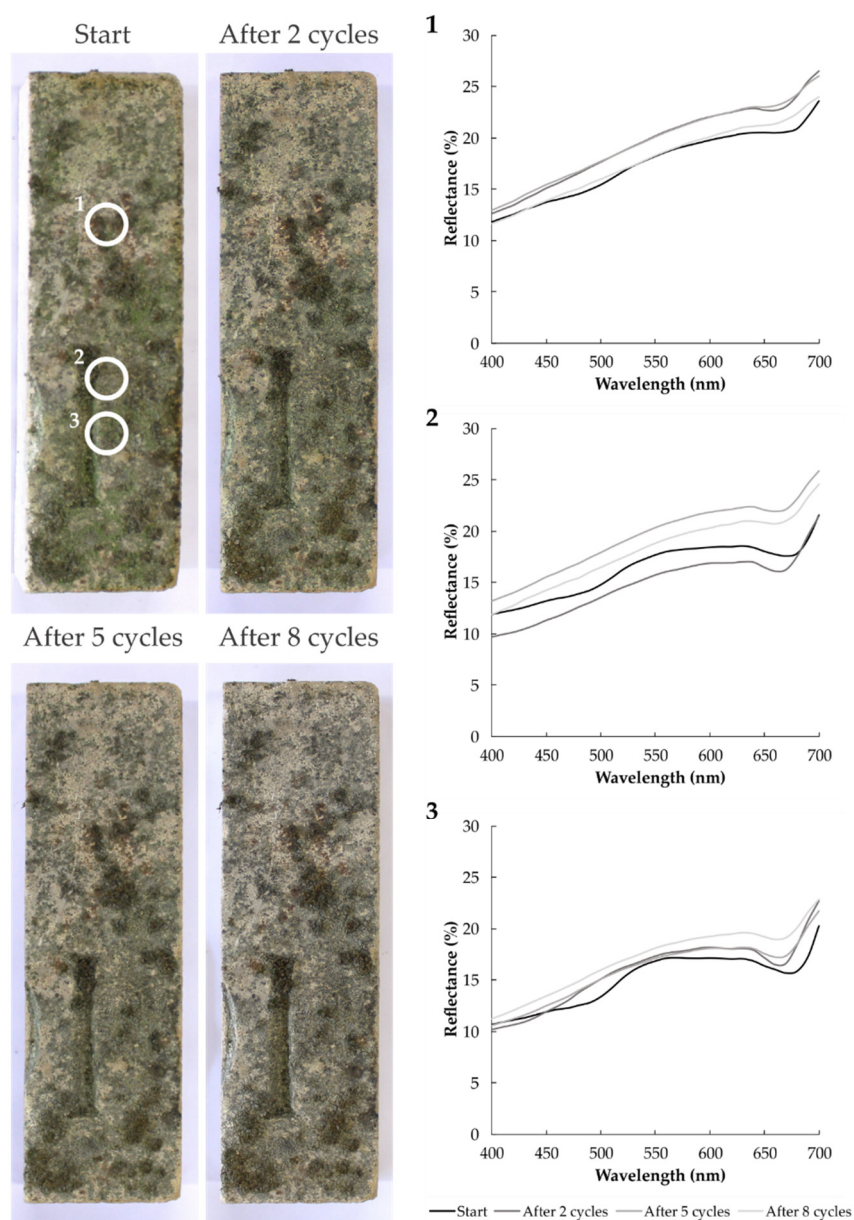



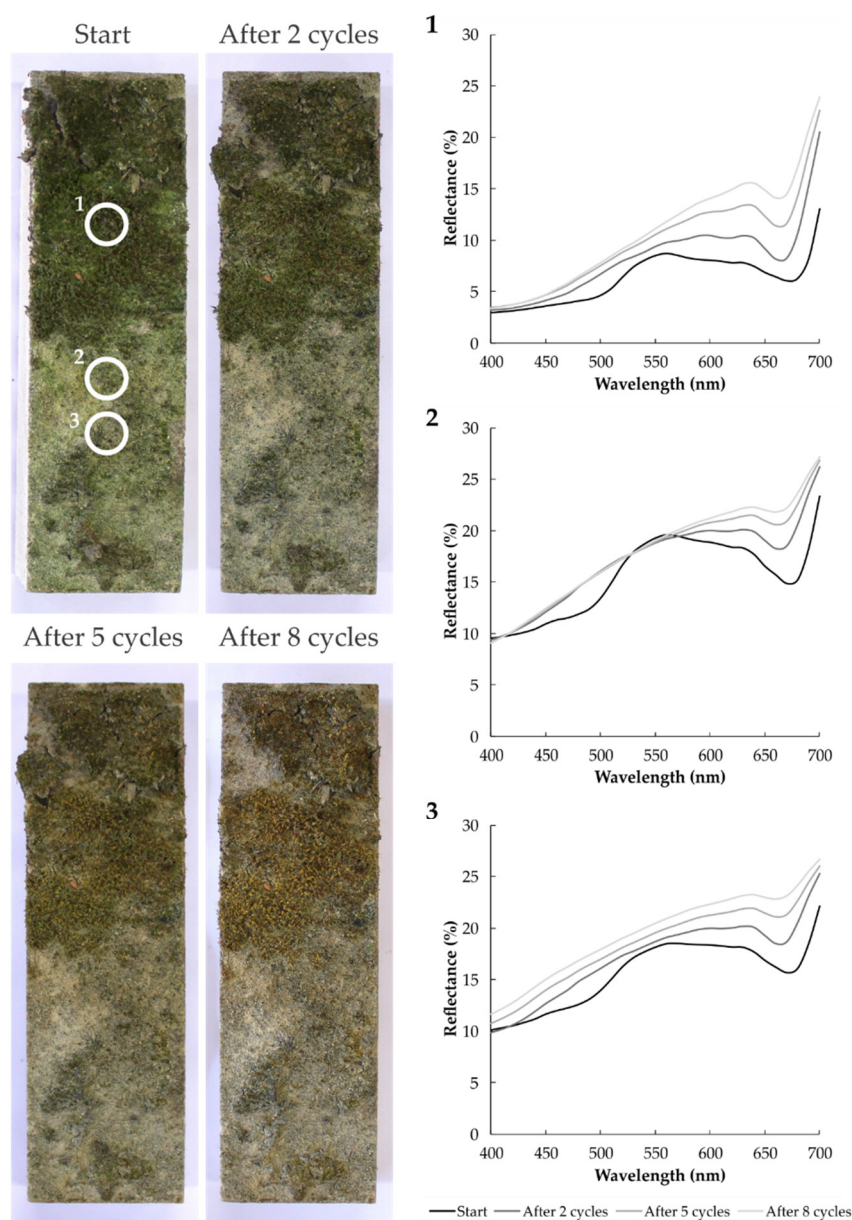

**Figure S4.** Appearance and spectral reflectance graphs determined at fixed locations 1, 2 and 3 of treated Sample 4 from the start and after different cycles of capillary absorption and drought.

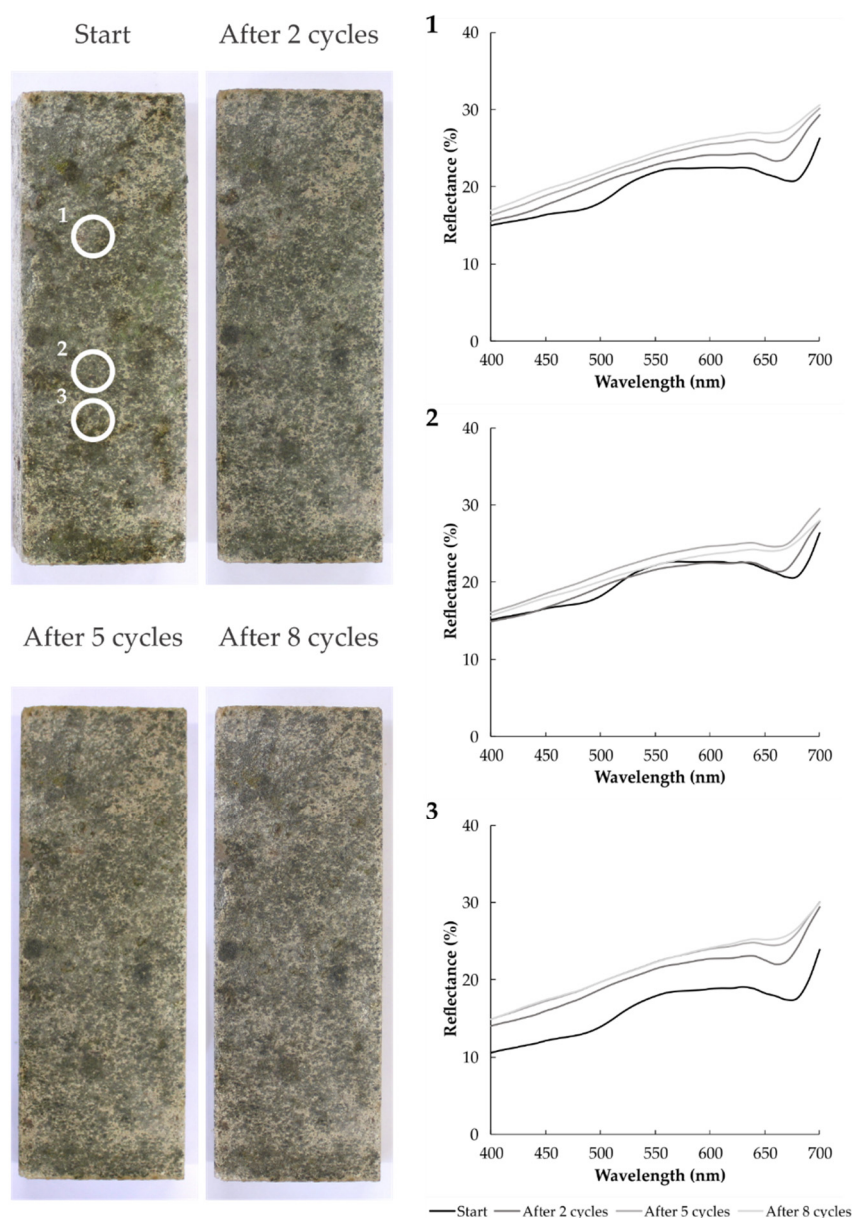

**Figure S5.** Appearance and spectral reflectance graphs determined at fixed locations 1, 2 and 3 of treated Sample 5 from the start and after different cycles of capillary absorption and drought.

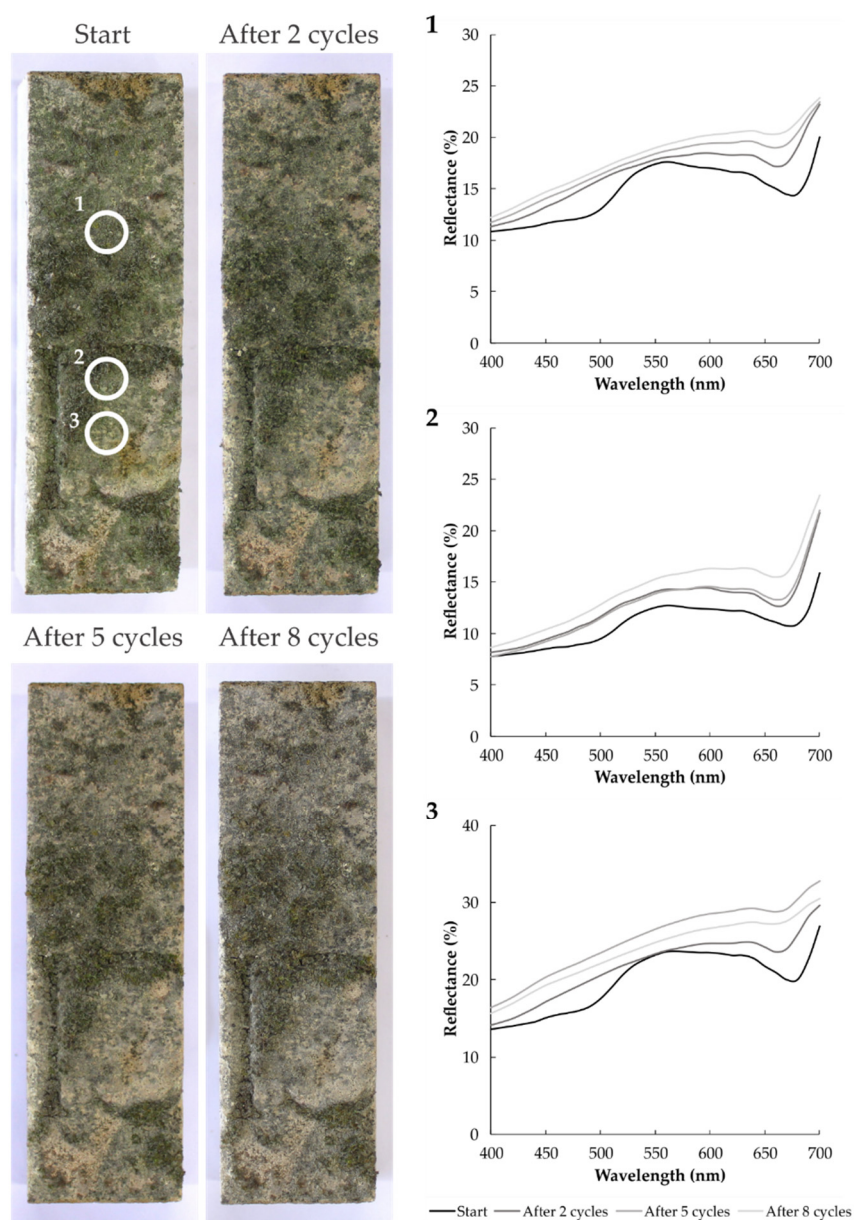

**Figure S6.** Appearance and spectral reflectance graphs determined at fixed locations 1, 2 and 3 of treated Sample 6 from the start and after different cycles of capillary absorption and drought.

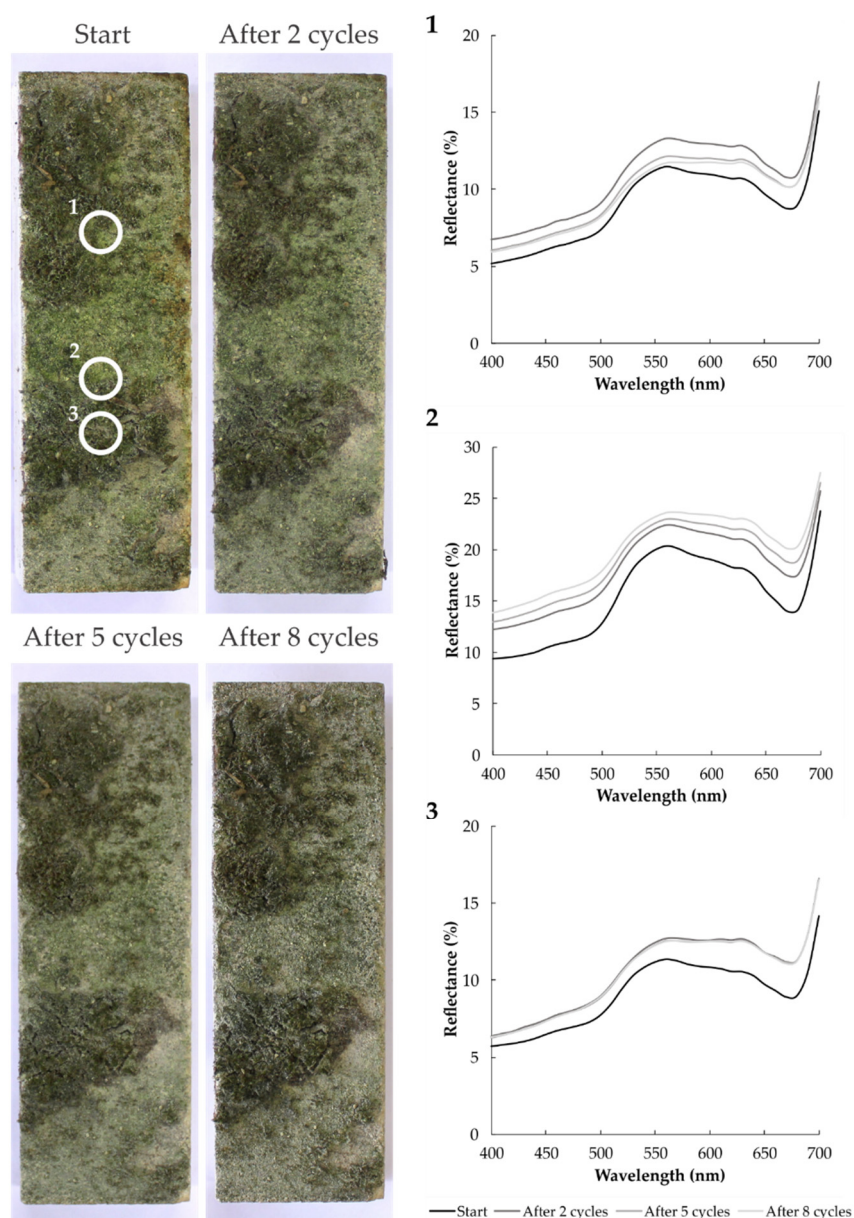

**Figure S7.** Appearance and spectral reflectance graphs determined at fixed locations 1, 2 and 3 of untreated Sample 7 from the start and after different cycles of water runoff and drought.



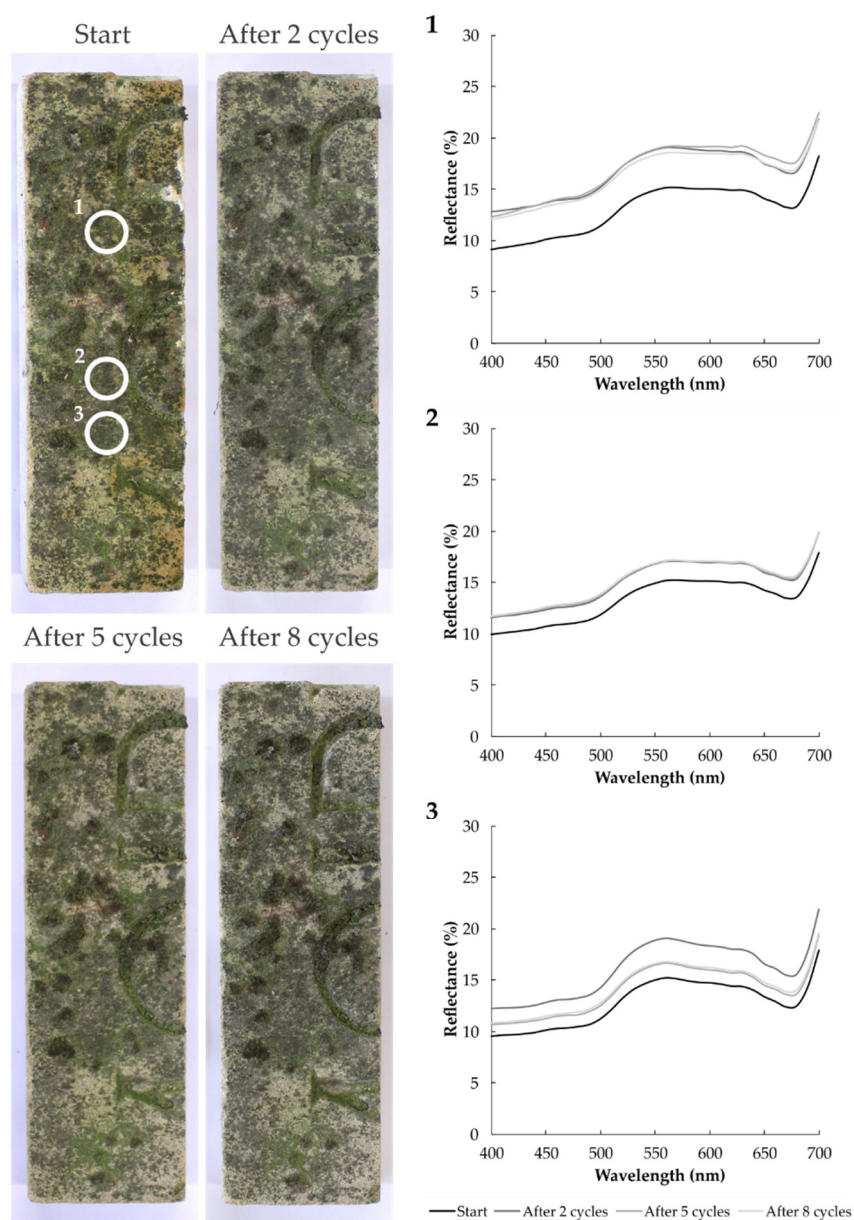

**Figure S8.** Appearance and spectral reflectance graphs determined at fixed locations 1, 2 and 3 of untreated Sample 8 from the start and after different cycles of water runoff and drought.

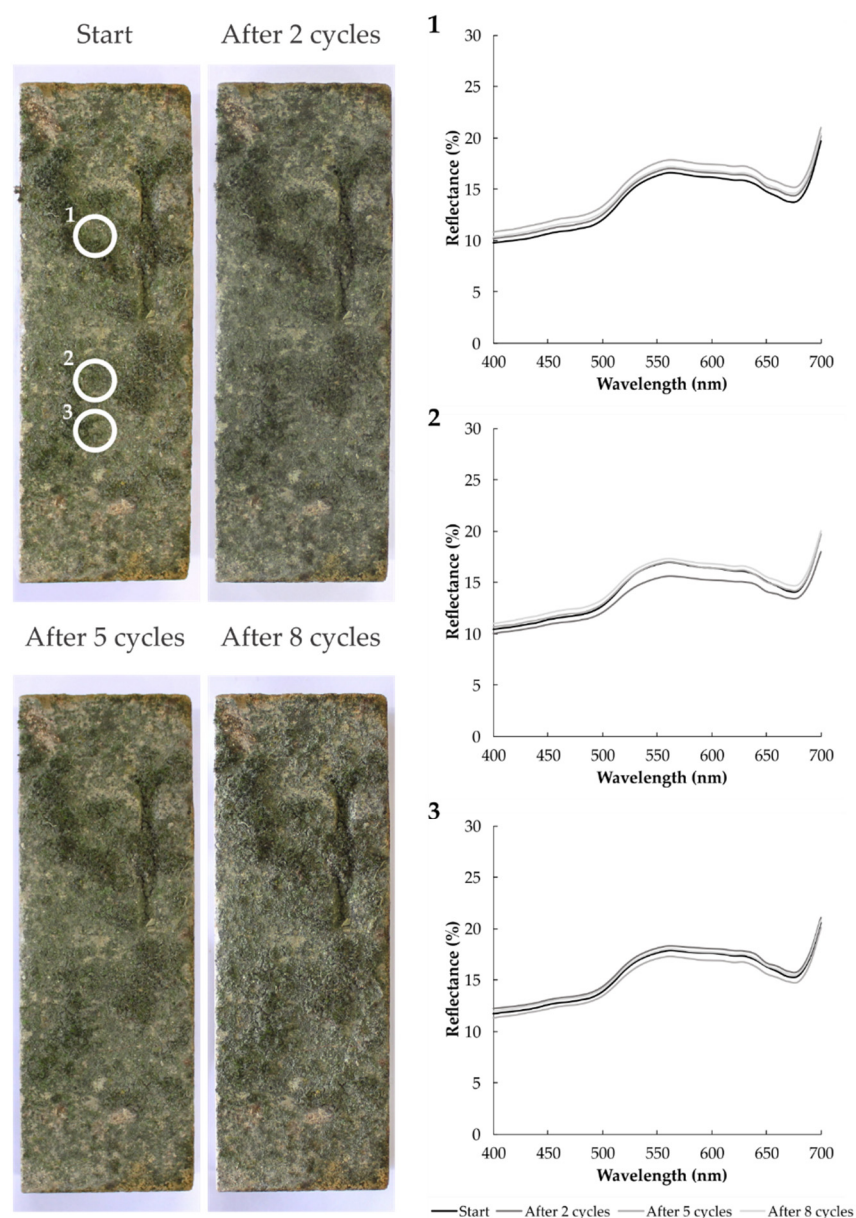

**Figure S9.** Appearance and spectral reflectance graphs determined at fixed locations 1, 2 and 3 of untreated Sample 9 from the start and after different cycles of capillary absorption and drought.

**Table S1.** Initial CD (%) of 30 measurements at Site A before enzyme-based treatment and  $\Delta$ CD (%) during subsequent field surveys (per date).

| –      | CD    |        | $\Delta$ CD (%) |        |        |        |        |        |
|--------|-------|--------|-----------------|--------|--------|--------|--------|--------|
| Sample | 29/04 | 06/05  | 13/05           | 27/05  | 18/06  | 05/08  | 09/09  | 03/10  |
| 1      | 2.05  | −0.49  | −6.83           | −22.44 | −10.24 | −5.37  | 18.05  | 1.95   |
| 2      | 2.13  | −12.21 | −11.74          | −21.60 | −7.04  | −22.54 | −2.82  | −2.35  |
| 3      | 5.61  | −34.05 | −36.36          | −26.56 | −40.29 | −40.46 | −68.63 | −19.96 |
| 4      | 5.69  | −39.02 | −54.48          | −12.48 | −59.93 | −61.51 | −72.41 | −21.79 |
| 5      | 5.26  | −45.63 | −55.70          | −54.56 | −59.32 | −61.03 | −54.75 | −50.57 |
| 6      | 5.87  | −51.11 | −57.92          | −57.41 | −65.25 | −64.91 | −62.69 | −58.94 |
| 7      | 2.96  | −35.81 | −34.12          | −40.54 | −41.55 | −33.11 | −25.68 | −28.38 |
| 8      | 2.43  | −14.40 | −25.10          | −31.69 | −30.04 | −28.40 | −11.52 | −25.10 |
| 9      | 2.80  | −18.93 | −52.14          | −23.21 | −33.21 | −27.50 | −21.43 | −13.21 |
| 10     | 5.05  | −58.22 | −39.41          | −41.39 | −47.92 | −53.47 | −65.35 | −34.06 |
| 11     | 2.94  | −9.18  | −25.17          | −13.95 | −30.27 | −28.23 | −37.07 | 6.46   |
| 12     | 2.88  | −10.42 | −25.00          | −20.83 | −23.96 | −35.76 | −42.71 | −5.90  |
| 13     | 1.73  | 2.89   | 0.58            | −19.65 | −15.03 | −20.81 | −4.62  | −12.14 |
| 14     | 2.99  | −34.78 | −44.48          | −45.82 | −50.17 | −47.83 | −40.13 | −37.46 |
| 15     | 3.91  | −37.85 | −41.18          | −33.76 | −51.92 | −50.13 | −50.90 | −37.60 |
| 16     | 4.00  | −33.25 | −39.00          | −31.00 | −43.50 | −51.75 | −53.75 | −14.75 |
| 17     | 3.63  | −32.23 | −39.39          | −13.50 | −40.22 | −34.71 | −54.55 | −3.03  |
| 18     | 3.58  | −34.08 | −45.53          | −25.14 | −48.88 | −46.09 | −41.06 | −45.81 |
| 19     | 2.16  | −6.48  | −26.85          | −25.93 | −22.69 | −26.39 | −15.74 | −23.61 |
| 20     | 2.48  | −20.16 | −20.56          | −34.68 | −34.68 | −25.00 | −27.02 | −31.85 |
| 21     | 3.70  | −34.59 | −45.14          | −33.78 | −40.54 | −44.59 | −41.35 | −23.24 |
| 22     | 3.57  | −19.89 | −57.14          | −30.25 | −37.25 | −37.54 | −48.18 | 3.08   |
| 23     | 3.28  | −7.62  | −34.15          | −28.05 | −24.09 | −16.77 | −37.50 | −10.98 |
| 24     | 4.04  | −27.72 | −49.01          | −29.95 | −47.03 | −46.53 | −43.32 | −30.45 |
| 25     | 1.93  | 10.36  | 15.54           | −9.33  | −6.74  | 0.52   | 31.09  | 0.00   |
| 26     | 2.79  | −20.07 | −51.97          | −32.26 | −29.03 | −20.43 | −36.56 | −12.90 |
| 27     | 2.31  | −30.74 | −24.24          | −29.44 | −10.82 | −15.15 | −39.83 | 2.16   |
| 28     | 7.15  | −55.94 | −57.90          | −40.70 | −54.41 | −60.00 | −71.05 | −44.06 |
| 29     | 6.71  | −46.94 | −51.71          | −29.21 | −52.01 | −50.07 | −76.60 | −30.40 |
| 30     | 4.35  | −38.85 | −47.82          | −46.90 | −44.60 | −53.10 | −48.05 | −44.37 |

**Table S2.** Initial CD (%) of 30 measurements at Site B before enzyme-based treatment and  $\Delta$ CD (%) during subsequent field surveys (per date).

| –      | CD    |        | $\Delta$ CD (%) |        |        |        |        |        |
|--------|-------|--------|-----------------|--------|--------|--------|--------|--------|
| Sample | 29/04 | 06/05  | 13/05           | 27/05  | 18/06  | 05/08  | 09/09  | 03/10  |
| 1      | 1.70  | −12.94 | −24.12          | −28.82 | −25.88 | −28.82 | −20.59 | −33.53 |
| 2      | 2.85  | −46.32 | −56.84          | −54.04 | −57.54 | −57.54 | −55.09 | −52.98 |
| 3      | 4.97  | −67.61 | −71.63          | −68.61 | −64.99 | −64.19 | −68.81 | −68.61 |
| 4      | 5.83  | −72.90 | −75.81          | −71.18 | −69.98 | −73.41 | −75.81 | −75.13 |
| 5      | 5.63  | −63.94 | −67.67          | −59.15 | −66.61 | −68.56 | −73.18 | −69.98 |
| 6      | 4.17  | −58.51 | −59.95          | −50.84 | −58.27 | −53.72 | −56.83 | −57.31 |
| 7      | 5.49  | −44.63 | −58.47          | −58.11 | −59.74 | −59.56 | −60.29 | −62.48 |
| 8      | 6.67  | −46.18 | −61.32          | −61.17 | −64.92 | −63.42 | −64.32 | −71.81 |
| 9      | 13.91 | −72.03 | −82.67          | −82.96 | −83.82 | −83.47 | −82.24 | −83.03 |
| 10     | 13.38 | −72.72 | −83.71          | −83.93 | −86.10 | −83.26 | −84.23 | −83.78 |
| 11     | 11.89 | −70.23 | −79.06          | −78.47 | −80.40 | −83.35 | −79.65 | −80.15 |
| 12     | 12.38 | −73.10 | −81.02          | −80.94 | −81.74 | −81.74 | −80.78 | −80.78 |
| 13     | 2.19  | −9.59  | −31.51          | −30.14 | −24.20 | −23.74 | −24.66 | −27.85 |
| 14     | 2.97  | −57.91 | −65.66          | −63.97 | −60.94 | −61.95 | −65.99 | −62.29 |
| 15     | 4.27  | −48.95 | −56.21          | −64.87 | −61.36 | −65.81 | −57.14 | −64.64 |
| 16     | 10.18 | −58.64 | −68.17          | −70.73 | −75.15 | −77.31 | −75.05 | −75.74 |
| 17     | 8.32  | −55.65 | −67.07          | −67.19 | −72.60 | −72.48 | −72.60 | −73.68 |
| 18     | 7.94  | −62.34 | −76.32          | −73.43 | −70.91 | −76.45 | −72.54 | −73.68 |
| 19     | 2.69  | −10.41 | −29.00          | −15.61 | −13.38 | −13.01 | −13.38 | −26.39 |
| 20     | 2.21  | −10.41 | −38.01          | −35.29 | −11.76 | −10.86 | −11.31 | −25.34 |
| 21     | 4.43  | −55.53 | −62.98          | −63.43 | −63.43 | −59.37 | −58.01 | −59.59 |
| 22     | 5.49  | −51.18 | −68.67          | −64.12 | −64.85 | −63.93 | −63.21 | −62.11 |
| 23     | 4.80  | −60.21 | −72.29          | −63.75 | −60.83 | −63.13 | −63.54 | −59.17 |
| 24     | 3.29  | −34.65 | −55.62          | −48.02 | −44.98 | −46.20 | −45.29 | −42.55 |
| 25     | 7.90  | −73.92 | −76.20          | −78.10 | −78.99 | −76.08 | −81.14 | −79.87 |
| 26     | 4.87  | −65.09 | −74.74          | −66.32 | −71.46 | −68.38 | −71.66 | −68.17 |
| 27     | 6.04  | −57.45 | −65.73          | −70.36 | −69.54 | −64.40 | −67.55 | −68.71 |
| 28     | 3.03  | −15.84 | −44.22          | −45.87 | −37.29 | −31.35 | −31.35 | −37.29 |
| 29     | 3.26  | −29.75 | −50.31          | −50.31 | −46.01 | −43.87 | −52.15 | −48.47 |
| 30     | 5.15  | −57.48 | −66.02          | −70.10 | −64.08 | −63.11 | −66.02 | −64.85 |



**Table S3.** Initial CD (%) of 30 measurements at Site C before enzyme-based treatment and  $\Delta$ CD (%) during subsequent field surveys (per date).

| –      | CD    |        | $\Delta$ CD (%) |        |        |        |        |        |
|--------|-------|--------|-----------------|--------|--------|--------|--------|--------|
| Sample | 29/04 | 06/05  | 13/05           | 27/05  | 18/06  | 05/08  | 09/09  | 03/10  |
| 1      | 5.89  | −65.53 | −75.89          | −66.72 | −66.38 | −68.42 | −69.78 | −60.44 |
| 2      | 4.52  | −54.87 | −67.04          | −61.50 | −63.94 | −60.18 | −63.27 | −48.89 |
| 3      | 5.60  | −50.00 | −66.61          | −58.39 | −64.64 | −63.04 | −65.00 | −39.11 |
| 4      | 2.58  | −31.01 | −37.21          | −32.17 | −40.70 | −38.37 | −32.56 | −8.91  |
| 5      | 4.32  | −45.83 | −55.32          | −48.38 | −52.78 | −54.40 | −53.70 | −25.23 |
| 6      | 3.66  | −58.47 | −59.02          | −52.46 | −56.56 | −54.37 | −49.18 | −44.26 |
| 7      | 5.84  | −67.12 | −66.61          | −70.21 | −68.49 | −69.86 | −70.89 | −60.45 |
| 8      | 5.35  | −57.94 | −66.92          | −64.30 | −72.71 | −71.03 | −68.41 | −62.06 |
| 9      | 4.07  | −43.24 | −63.14          | −55.04 | −63.64 | −54.79 | −64.62 | −33.91 |
| 10     | 4.23  | −46.10 | −70.45          | −56.97 | −56.74 | −50.35 | −52.96 | −19.62 |
| 11     | 3.44  | −45.64 | −63.66          | −52.03 | −42.15 | −38.95 | −54.65 | −35.47 |
| 12     | 2.95  | −36.61 | −48.47          | −40.68 | −42.37 | −38.64 | −43.39 | −38.31 |
| 13     | 3.85  | −56.62 | −61.30          | −60.00 | −60.78 | −58.44 | −58.70 | −45.97 |
| 14     | 10.96 | −82.76 | −87.68          | −85.04 | −85.68 | −86.50 | −85.95 | −81.57 |
| 15     | 2.10  | −15.71 | −66.19          | −31.90 | −37.14 | −37.14 | −48.10 | −27.14 |
| 16     | 2.42  | −14.05 | −51.65          | −34.71 | −43.80 | −31.40 | −42.98 | −12.40 |
| 17     | 2.28  | −14.04 | −61.40          | −35.96 | −28.95 | −30.70 | −44.30 | −35.09 |
| 18     | 12.86 | −87.09 | −91.06          | −85.93 | −88.10 | −89.42 | −86.86 | −84.84 |
| 19     | 5.14  | −49.22 | −63.62          | −56.42 | −3.31  | −53.11 | −51.36 | −47.67 |
| 20     | 4.88  | −47.75 | −58.20          | −49.18 | −9.43  | −53.07 | −51.23 | −48.36 |
| 21     | 4.95  | −61.21 | −70.30          | −64.04 | −24.44 | −58.59 | −63.03 | −48.69 |
| 22     | 4.17  | −59.95 | −64.75          | −53.96 | −15.11 | −53.96 | −55.64 | −55.64 |
| 23     | 3.14  | −32.17 | −52.87          | −53.18 | −46.82 | −44.59 | −43.63 | −39.17 |
| 24     | 2.87  | −39.37 | −47.74          | −40.77 | −41.11 | −36.93 | −42.51 | −23.34 |
| 25     | 8.98  | −72.05 | −79.40          | −77.39 | −77.95 | −75.95 | −75.28 | −68.93 |
| 26     | 6.82  | −64.37 | −72.87          | −72.87 | −70.53 | −67.74 | −65.40 | −58.65 |
| 27     | 6.18  | −61.97 | −73.14          | −65.86 | −67.15 | −63.27 | −66.02 | −64.08 |
| 28     | 3.11  | −41.80 | −66.88          | −47.91 | −54.34 | −48.87 | −51.45 | −50.80 |
| 29     | 4.88  | −57.99 | −71.93          | −67.21 | −63.73 | −58.61 | −62.70 | −53.89 |
| 30     | 3.32  | −49.70 | −59.04          | −57.23 | −64.76 | −63.55 | −67.47 | −58.73 |

**Table S4.** Initial CD (%) of 30 measurements at Site D before enzyme-based treatment and  $\Delta$ CD (%) during subsequent field surveys (per date).

| –      | CD    |        | $\Delta$ CD (%) |        |        |        |        |        |
|--------|-------|--------|-----------------|--------|--------|--------|--------|--------|
| Sample | 29/04 | 06/05  | 13/05           | 27/05  | 18/06  | 05/08  | 09/09  | 03/10  |
| 1      | 4.19  | −51.79 | −60.14          | −55.13 | −54.18 | −54.89 | −58.71 | −12.17 |
| 2      | 4.58  | −51.09 | −54.15          | −51.75 | −53.06 | −60.26 | −64.63 | −53.71 |
| 3      | 11.47 | −56.41 | −72.97          | −75.41 | −75.33 | −73.58 | −66.00 | −31.91 |
| 4      | 10.26 | −53.51 | −72.90          | −73.29 | −76.71 | −73.59 | −71.35 | −48.54 |
| 5      | 9.67  | −38.78 | −70.32          | −72.70 | −73.73 | −69.80 | −71.46 | −52.74 |
| 6      | 10.86 | −51.75 | −74.68          | −75.14 | −75.41 | −72.65 | −71.27 | −55.06 |
| 7      | 3.61  | −37.40 | −37.12          | −43.77 | −48.48 | −45.98 | −39.34 | −10.25 |
| 8      | 3.57  | −34.73 | −36.41          | −71.15 | −42.30 | −38.38 | −33.61 | −11.48 |
| 9      | 5.36  | −47.76 | −54.66          | −56.72 | −54.48 | −53.36 | −53.17 | −36.57 |
| 10     | 5.59  | −54.38 | −58.14          | −60.29 | −58.14 | −56.53 | −56.71 | −43.83 |
| 11     | 5.49  | −51.91 | −51.73          | −54.10 | −52.64 | −50.82 | −41.53 | −23.13 |
| 12     | 6.86  | −38.48 | −54.52          | −52.04 | −50.00 | −59.48 | −42.71 | −2.33  |
| 13     | 3.76  | −54.26 | −50.00          | −47.07 | −50.00 | −48.40 | −37.77 | 13.56  |
| 14     | 3.65  | −46.30 | −44.38          | −40.27 | −42.74 | −45.48 | −45.48 | −41.37 |
| 15     | 5.54  | −59.21 | −57.94          | −60.83 | −57.22 | −58.84 | −41.70 | 9.57   |
| 16     | 5.61  | −55.97 | −57.58          | −56.86 | −58.11 | −55.44 | −39.22 | −13.37 |
| 17     | 4.58  | −48.25 | −47.38          | −52.18 | −47.16 | −41.92 | −26.42 | 0.00   |
| 18     | 6.58  | −58.51 | −60.79          | −63.83 | −62.61 | −61.09 | −54.56 | −2.43  |
| 19     | 5.24  | −50.76 | −46.76          | −49.05 | −56.30 | −58.40 | −52.29 | −23.66 |
| 20     | 6.53  | −51.61 | −51.15          | −58.35 | −57.27 | −56.81 | −60.64 | −48.24 |
| 21     | 7.32  | −49.73 | −61.34          | −60.79 | −61.61 | −65.16 | −62.02 | −40.16 |
| 22     | 8.03  | −51.56 | −64.13          | −62.52 | −62.89 | −66.13 | −64.38 | −50.93 |
| 23     | 7.41  | −52.36 | −58.57          | −61.27 | −60.73 | −59.38 | −52.90 | −39.14 |
| 24     | 7.90  | −49.62 | −61.90          | −65.19 | −62.03 | −64.30 | −57.34 | −43.04 |
| 25     | 5.21  | −51.44 | −69.87          | −62.00 | −54.89 | −59.69 | −50.10 | −62.57 |
| 26     | 4.05  | −46.67 | −54.07          | −46.67 | −42.96 | −46.42 | −40.25 | −37.78 |
| 27     | 2.72  | −23.16 | −38.97          | −23.90 | −30.88 | −23.16 | −24.63 | 1.10   |
| 28     | 5.93  | −56.49 | −59.87          | −55.14 | −58.35 | −54.47 | −54.64 | −43.68 |
| 29     | 5.03  | −41.75 | −51.29          | −42.94 | −47.32 | −44.93 | −33.80 | 16.70  |
| 30     | 4.39  | −51.03 | −56.95          | −50.11 | −48.97 | −41.69 | −41.46 | −27.56 |
